# Supplementary material
Source: PubMed Central journal article supplement (PMC6780664)
Supplement: ajcr0009-1922-f8.pdf [file ajcr0009-1922-f8.pdf]

## AZD8055 enhances radiosensitivity of NPC cells

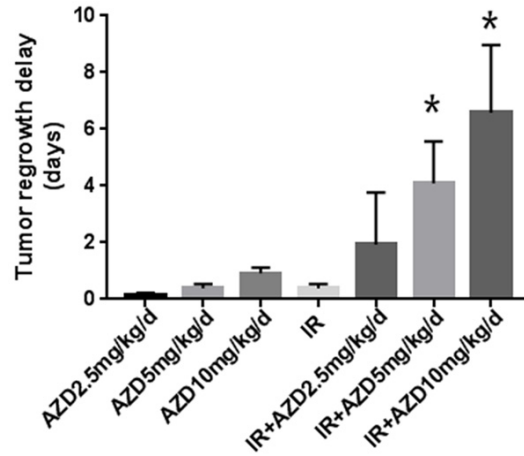

**Figure S1.** The Tumor regrowth delays in different treated mice. Tumor regrowth delay was expressed as the time in days for xenografts treated with AZD8055 combined with IR to grow from 100 to 250 mm<sup>3</sup> in volume minus the time in days for untreated tumors to reach the same size. IR combined with 5 mg/kg/d and 10 mg/kg/d significantly increased the tumor regrowth delay. (\* $P < 0.05$ ).

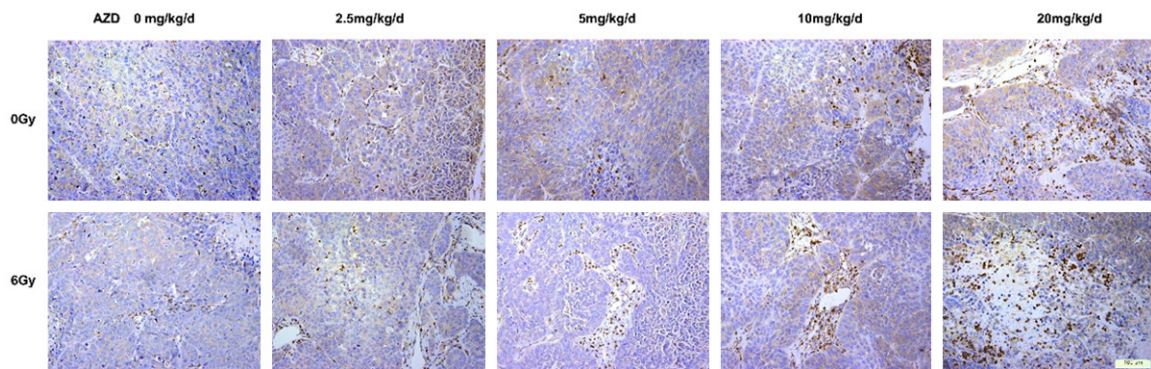

**Figure S2.** AZD and IR induced autophagy in the animal tumors. Tumor tissues from different treatments were subjected to IHC assays of LC3B (200 folds). It was obviously that LC3B expressions were increased along with the increased AZD8055 dose. 6 Gy irradiation also induced LC3B increase. The irradiation combined with different doses of AZD8055 possessed higher LC3B positive than AZD8055 alone except for 20 mg/kg/d AZD8055 alone or combined with irradiation.

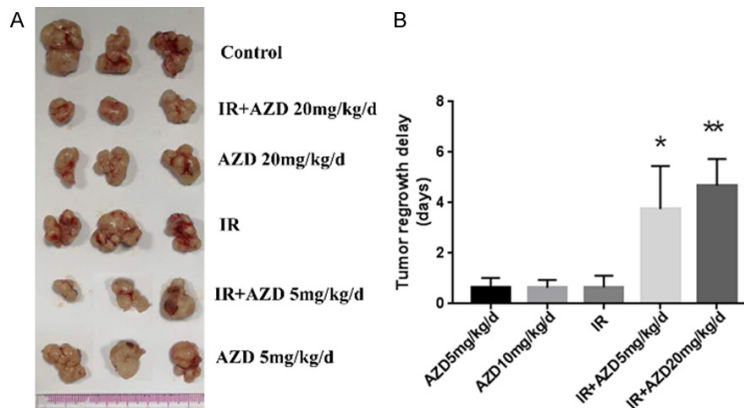

**Figure S3.** The Tumor regrowth of different treated mice. A. Photograph of a representative xenograft in each group obtained when the mice were sacrificed 21 days after IR. B. The Tumor regrowth delays were expressed as the time in days for untreated tumors to reach the same sizes. IR combined with 5 mg/kg/d and 20 mg/kg/d significantly increased the tumor regrowth delay. (\* $P < 0.05$ , \*\* $P < 0.01$ ).
